# Supplementary material for: Association of Frailty and Long‐Term Survival in Patients Undergoing Coronary Artery Bypass Grafting
Source: PubMed Central journal article supplement — J Am Heart Assoc. 2018 Jul 20;7(15):e009882. doi: 10.1161/JAHA.118.009882 (PMC6201467; doi:10.1161/jaha.118.009882), 2018-07-20
Supplement: JAH3-7-e009882-s001.pdf [file JAH3-7-e009882-s001.pdf]

# **SUPPLEMENTAL MATERIAL**

**Table S1. Johns Hopkins ACG frailty-defining diagnosis indicators.**

| Domains                    | Examples                                   |
|----------------------------|--------------------------------------------|
| Malnutrition               | Severe protein-calorie malnutrition        |
| Dementia                   | Dementia with delirium                     |
| Impaired vision            | Profound macular degeneration in both eyes |
| Decubitus ulcer            | Decubitus ulcer                            |
| Incontinence               | Incontinence of urine                      |
| Weight loss                | Unintentional weight loss                  |
| Poverty                    | Inadequate housing or material resources   |
| Barriers to access to care | No available medical facilities for care   |
| Difficulty walking         | Difficulty walking                         |
| Fall                       | Fall on steps                              |

**Table S2. Multivariable predictors of long-term mortality post CABG in the expanded model.**

| Variable                     |             | Main Model       | Cluster by Site  | Completeness of Revascularization Added |
|------------------------------|-------------|------------------|------------------|-----------------------------------------|
|                              |             | HR (95% CI)      | HR (95% CI)      | HR (95% CI)                             |
| Frailty                      |             | 1.20 (1.12-1.28) | 1.20 (1.13-1.29) | 1.20 (1.12-1.28)                        |
| Age Group                    | 40-64       | Reference        | Reference        | Reference                               |
|                              | 65-74       | 1.61 (1.49-1.75) | 1.61 (1.49-1.74) | 1.60 (1.48-1.73)                        |
|                              | 75-84       | 2.86 (2.63-3.10) | 2.85 (2.63-3.09) | 2.81 (2.59-3.06)                        |
|                              | ≥ 85        | 4.44 (3.80-5.19) | 4.38 (3.74-5.12) | 4.28 (3.66-5.01)                        |
| Sex                          |             | 1.06 (0.99-1.14) | 1.06 (0.99-1.14) | 1.06 (0.99-1.14)                        |
| Rural Residence              |             | 1.04 (0.96-1.13) | 1.01 (0.93-1.10) | 1.03 (0.95-1.12)                        |
| Rurality (Missing)           |             | 0.77 (0.23-2.61) | 0.86 (0.25-2.89) | 0.76 (0.23-2.57)                        |
| Income Quintile              | 1 (Lowest)  | 1.24 (1.12-1.36) | 1.21 (1.10-1.34) | 1.24 (1.13-1.37)                        |
|                              | 2           | 1.16 (1.05-1.28) | 1.15 (1.04-1.26) | 1.16 (1.05-1.28)                        |
|                              | 3           | 1.08 (0.98-1.19) | 1.07 (0.97-1.18) | 1.09 (0.98-1.20)                        |
|                              | 4           | 1.12 (1.02-1.24) | 1.12 (1.01-1.23) | 1.12 (1.01-1.24)                        |
|                              | 5 (Highest) | Reference        | Reference        | Reference                               |
| Missing                      |             | 1.25 (0.80-1.96) | 1.17 (0.75-1.83) | 1.25 (0.80-1.95)                        |
| Remote MI                    |             | 1.11 (1.04-1.19) | 1.11 (1.04-1.19) | 1.10 (1.03-1.18)                        |
| Recent MI                    |             | 1.24 (1.16-1.32) | 1.23 (1.15-1.31) | 1.24 (1.16-1.32)                        |
| Previous PCI                 |             | 0.94 (0.87-1.03) | 0.94 (0.87-1.03) | 0.95 (0.87-1.04)                        |
| Hypertension                 |             | 1.22 (1.07-1.38) | 1.22 (1.07-1.38) | 1.22 (1.08-1.38)                        |
| Atrial Fibrillation          |             | 1.37 (1.26-1.49) | 1.37 (1.25-1.49) | 1.37 (1.26-1.50)                        |
| HF Status                    | pEF, No HF  | Reference        | Reference        | Reference                               |
|                              | rEF, No HF  | 1.36 (1.25-1.48) | 1.39 (1.28-1.51) | 1.36 (1.26-1.48)                        |
|                              | HFpEF       | 2.00 (1.80-2.21) | 1.98 (1.79-2.20) | 1.99 (1.80-2.20)                        |
|                              | HFrEF       | 2.75 (2.53-2.98) | 2.79 (2.57-3.03) | 2.73 (2.51-2.96)                        |
| Cerebrovascular Disease      |             | 1.25 (1.15-1.35) | 1.25 (1.16-1.36) | 1.23 (1.14-1.34)                        |
| Peripheral Vascular Disease  |             | 1.78 (1.66-1.90) | 1.75 (1.63-1.87) | 1.78 (1.66-1.91)                        |
| COPD/Asthma                  |             | 1.46 (1.37-1.55) | 1.44 (1.36-1.53) | 1.46 (1.37-1.55)                        |
| Diabetes                     |             | 1.27 (1.20-1.35) | 1.28 (1.20-1.36) | 1.27 (1.19-1.35)                        |
| Morbid Obesity               |             | 1.05 (0.97-1.13) | 1.03 (0.95-1.12) | 1.04 (0.96-1.13)                        |
| Hypothyroidism               |             | 0.95 (0.76-1.18) | 0.95 (0.76-1.18) | 0.96 (0.76-1.20)                        |
| Anemia                       |             | 1.17 (1.05-1.30) | 1.18 (1.06-1.31) | 1.17 (1.05-1.30)                        |
| Dialysis                     |             | 1.84 (1.60-2.12) | 1.87 (1.63-2.15) | 1.86 (1.62-2.14)                        |
| Chronic Renal Disease        |             | 1.54 (1.38-1.70) | 1.52 (1.37-1.68) | 1.52 (1.37-1.69)                        |
| Liver Disease                |             | 2.09 (1.67-2.62) | 2.11 (1.69-2.65) | 2.10 (1.67-2.63)                        |
| Primary Tumor                |             | 1.80 (1.62-1.99) | 1.79 (1.61-1.98) | 1.80 (1.63-2.00)                        |
| Metastatic Tumor             |             | 1.76 (1.35-2.30) | 1.73 (1.32-2.26) | 1.82 (1.40-2.38)                        |
| Dementia                     |             | 1.34 (1.00-1.81) | 1.36 (1.01-1.84) | 1.35 (1.00-1.82)                        |
| Emergent Surgery             |             | 1.39 (1.26-1.54) | 1.40 (1.27-1.55) | 1.36 (1.23-1.50)                        |
| Incomplete Revascularization |             | --               | --               | 1.19 (1.12-1.27)                        |

\* HF, heart failure; pEF, preserved ejection fraction; rEF, reduced ejection fraction; MI, myocardial infarction; PCI, percutaneous coronary intervention; COPD, chronic obstructive pulmonary disease; HR = hazard ratio; CI = confidence interval
